# Supplementary material for: Glacial dynamics in pre-Alpine narrow valleys during the Last Glacial Maximum inferred by lowland fluvial records (northeast Italy)
Source: Copernicus journal article supplement (doi:10.5194/esurf-6-809-2018), 2018-09-26
Supplement: Supplementary file 1 [file esurf-6-809-2018-supplement.zip]

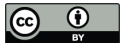

*Supplement of*

**Glacial dynamics in pre-Alpine narrow valleys during the Last Glacial Maximum inferred by lowland fluvial records (northeast Italy)**

**Sandro Rossato et al.**

*Correspondence to:* Sandro Rossato ([sandro.rossato@unipd.it](mailto:sandro.rossato@unipd.it))

- [esurf-6-809-2018-supplement-title-page.pdf](#)
- [Rossato-et-al\\_Piazzola\\_supplementary-captions.pdf](#)
- [SFig1.pdf](#)
- [STab01.pdf](#)

The copyright of individual parts of the supplement might differ from the CC BY 4.0 License.
