# Supplementary material for: Glacial dynamics in pre-Alpine narrow valleys during the Last Glacial Maximum inferred by lowland fluvial records (northeast Italy)
Source: Copernicus journal article supplement (doi:10.5194/esurf-6-809-2018), 2018-09-26
Supplement: Supplementary file 2 [file esurf-6-809-2018-supplement.zip]

Archive with 4 entries (4 files):
- STab01.pdf
- esurf-6-809-2018-supplement-title-page.pdf
- SFig1.pdf
- Rossato-et-al_Piazzola_supplementary-captions.pdf
