# Supplementary material for: Glacial dynamics in pre-Alpine narrow valleys during the Last Glacial Maximum inferred by lowland fluvial records (northeast Italy)
Source: Copernicus journal article supplement (doi:10.5194/esurf-6-809-2018), 2018-09-26
Supplement: Supplementary file 2 [file esurf-6-809-2018-supplement.zip › Rossato-et-al_Piazzola_supplementary-captions.pdf]

# Lowlands fluvial sedimentation enlightens glacial dynamics in narrow valleys during the Last Glacial Maximum (Venetian Forealps, Italy)

Sandro Rossato<sup>1</sup>, Anna Carraro<sup>2</sup>, Giovanni Monegato<sup>2</sup>, Paolo Mozzi<sup>1</sup>, Fabio Tateo<sup>2</sup>

<sup>1</sup>Department of Geosciences, University of Padova, 35131, Italy

5 <sup>2</sup>Institute of Geosciences and Earth Resources (IGG) – National Research Council (CNR), Padova, 35131, Italy

*Correspondence to:* Sandro Rossato (sandro.rossato@unipd.it)

## Supplementary material - captions

10 SFigure 1: Feldspars/quartz ratio in RB1 and PM1 cores (bulk sediments). This mineralogical parameter is useful to highlight peculiar compositional features of petrofacies A, B and C.

STable 1: Results of mineralogical and geochemical analyses of RB1 and PM1 cores.
