# Supplementary material for: Glacial dynamics in pre-Alpine narrow valleys during the Last Glacial Maximum inferred by lowland fluvial records (northeast Italy)
Source: Copernicus journal article supplement (doi:10.5194/esurf-6-809-2018), 2018-09-26
Supplement: Supplementary file 2 [file esurf-6-809-2018-supplement.zip › STab01.pdf]

**RB1 core**

|                                    | 1   | 2   | 3   | 4   | 5    | 6    | 7    | 8    | 9    | 10   | 11   | 12   | 13   | 14   | 15   | 16   | 17   | A     |
|------------------------------------|-----|-----|-----|-----|------|------|------|------|------|------|------|------|------|------|------|------|------|-------|
| Depth (m)                          | 0.5 | 4.7 | 8.4 | 9.3 | 10.0 | 10.1 | 15.6 | 16.4 | 16.9 | 17.9 | 18.5 | 24.5 | 26.5 | 27.4 | 27.6 | 27.9 | 29.9 | 21.85 |
| <b>Mineralogial analyses (wt%)</b> |     |     |     |     |      |      |      |      |      |      |      |      |      |      |      |      |      |       |
| Quartz                             | 21  | 35  | 17  | 19  | 14   | 18   | 33   | 14   | 12   | 37   | 19   | 28   | 26   | 15   | 25   | 41   | 39   | 27    |
| Calcite                            | 6   | 15  | 37  | 12  | 25   | 20   | 15   | 31   | 30   | 12   | 6    | 5    | 5    | 10   | 1    | 2    | 5    | 3     |
| Dolomites                          | 21  | 34  | 32  | 15  | 16   | 19   | 31   | 25   | 22   | 27   | 22   | 31   | 37   | 13   | 1    | 14   | 14   | 19    |
| Plagioclase                        | 6   | 10  | 5   | 4   | 3    | 4    | 11   | 3    | 2    | 12   | 6    | 9    | 10   | 10   | 13   | 20   | 19   | 10    |
| K-feldspar                         | 1   | 4   | 2   | 1   | 1    | <1   | 2    | 1    | 1    | 3    | 1    | 3    | 2    | 1    | 3    | 5    | 7    | 3     |
| Phyllosilicates                    | 33  | 3   | 2   | 33  | 36   | 18   | 8    | 25   | 26   | 10   | 38   | 17   | 19   | 45   | 21   | 19   | 11   | 29    |
| Am.XRD                             | 14  | <1  | 5   | 16  | 4    | 20   | <1   | 1    | 7    | <1   | 8    | 7    | 2    | 6    | 36   | <1   | 4    | 9     |

**Chemical analyses (wt%)**

|           |       |        |       |       |       |        |        |       |        |       |       |       |       |       |       |       |        |  |
|-----------|-------|--------|-------|-------|-------|--------|--------|-------|--------|-------|-------|-------|-------|-------|-------|-------|--------|--|
| SiO2      | 40.65 | 45.17  | 23.97 | 37.94 | 32.77 | 30.81  | 44.13  | 28.88 | 27.34  | 49.21 | 39.58 | 43.50 | 39.15 | 42.14 | 45.90 | 59.94 | 61.30  |  |
| TiO2      | 0.64  | 0.14   | 0.10  | 0.39  | 0.39  | 0.30   | 0.23   | 0.23  | 0.31   | 0.21  | 0.30  | 0.29  | 0.26  | 0.41  | 0.45  | 0.53  | 0.28   |  |
| Al2O3     | 14.00 | 5.62   | 3.29  | 13.19 | 12.96 | 8.96   | 6.23   | 8.33  | 9.64   | 7.25  | 14.62 | 9.13  | 8.95  | 16.18 | 11.84 | 12.40 | 10.94  |  |
| Fe2O3 tot | 5.03  | 1.25   | 0.75  | 4.17  | 4.72  | 2.82   | 1.90   | 2.92  | 3.99   | 1.82  | 5.36  | 2.95  | 2.93  | 5.67  | 3.45  | 3.13  | 2.43   |  |
| MnO       | 0.13  | 0.02   | 0.02  | 0.06  | 0.09  | 0.04   | 0.04   | 0.06  | 0.08   | 0.03  | 0.08  | 0.04  | 0.05  | 0.11  | 0.04  | 0.04  | 0.03   |  |
| MgO       | 5.30  | 5.36   | 5.97  | 4.90  | 4.31  | 4.79   | 5.29   | 5.26  | 5.48   | 4.92  | 5.81  | 7.17  | 7.82  | 3.82  | 1.35  | 3.13  | 2.51   |  |
| CaO       | 10.79 | 19.54  | 32.44 | 12.50 | 18.70 | 18.48  | 19.22  | 24.23 | 24.18  | 15.62 | 12.22 | 13.74 | 15.83 | 11.34 | 2.21  | 6.47  | 8.03   |  |
| Na2O      | 0.92  | 1.07   | 0.52  | 0.76  | 0.58  | 0.72   | 1.25   | 0.64  | 0.58   | 1.34  | 0.93  | 1.19  | 1.08  | 1.38  | 1.53  | 2.17  | 2.16   |  |
| K2O       | 2.73  | 1.47   | 0.71  | 2.92  | 2.87  | 1.94   | 1.45   | 1.82  | 2.16   | 1.88  | 3.50  | 2.21  | 2.14  | 3.55  | 2.49  | 2.95  | 2.85   |  |
| P2O5      | 0.17  | 0.05   | 0.04  | 0.11  | 0.10  | 0.11   | 0.07   | 0.11  | 0.11   | 0.07  | 0.13  | 0.09  | 0.09  | 0.15  | 0.16  | 0.10  | 0.09   |  |
| L.O.I.    | 19.04 | 20.51  | 31.89 | 22.63 | 22.15 | 31.27  | 20.23  | 27.35 | 26.51  | 17.45 | 17.35 | 19.55 | 21.32 | 15.16 | 30.42 | 8.68  | 9.49   |  |
| Tot       | 99.40 | 100.20 | 99.70 | 99.58 | 99.64 | 100.24 | 100.04 | 99.83 | 100.38 | 99.80 | 99.88 | 99.86 | 99.62 | 99.91 | 99.84 | 99.53 | 100.11 |  |
| N (%)     | 0.15  |        |       | 0.14  |       | 0.33   |        |       | 0.03   |       |       |       |       |       | 0.76  |       |        |  |
| Corg (%)  | 1.28  |        |       | 3.18  |       | 5.62   |        |       | 0.40   |       |       |       |       |       | 14.70 |       |        |  |

**ppm**

|    |     |     |     |     |     |     |    |     |     |    |     |    |    |     |     |    |     |  |
|----|-----|-----|-----|-----|-----|-----|----|-----|-----|----|-----|----|----|-----|-----|----|-----|--|
| As | 32  | 20  | 1   | 55  | 23  | 84  | 18 | 19  | 11  | 0  | <1  | 12 | 2  | 20  | 103 | 20 | 4.6 |  |
| Cd | 2.9 | 0   | 0   | 0   | 0   | 1   | 0  | <1  | 0   | 0  | 1   | 0  | 0  | 2   | 2   | 0  | 0   |  |
| Cr | 80  | 19  | 8   | 47  | 28  | 72  | 8  | 38  | 34  | 11 | 82  | 23 | 37 | 79  | 61  | 51 | 20  |  |
| Cu | 34  | 6   | 1   | 21  | 6   | 30  | 5  | 19  | 9   | 2  | 29  | 5  | 19 | 33  | 25  | 10 | 7   |  |
| Ni | 35  | 3   | 3   | 44  | 14  | 31  | 4  | 22  | 15  | 9  | 25  | 6  | 17 | 29  | 17  | 40 | 18  |  |
| Sr | 92  | 138 | 155 | 144 | 159 | 160 | 82 | 139 | 123 | 68 | 100 | 71 | 69 | 83  | 69  | 96 | 82  |  |
| Zn | 114 | 127 | 18  | 84  | 78  | 227 | 44 | 67  | 57  | 28 | 121 | 37 | 2  | 132 | 51  | 77 | 58  |  |

**PM1 core**

|                                    | A   | B   | C   | D    | E    | F    | G    | H    | I    | L    | M    | N    | O    | P    | Q    |
|------------------------------------|-----|-----|-----|------|------|------|------|------|------|------|------|------|------|------|------|
| Depth (m)                          | 5.2 | 6.7 | 9.0 | 11.1 | 12.5 | 13.5 | 14.2 | 15.4 | 16.8 | 17.9 | 18.3 | 19.5 | 20.3 | 24.1 | 29.5 |
| <b>Mineralogial analyses (wt%)</b> |     |     |     |      |      |      |      |      |      |      |      |      |      |      |      |
| Quartz                             | 17  | 28  | 22  | 15   | 29   | 14   | 18   | 12   | 31   | 17   | 15   | 33   | 13   | 15   | 35   |
| Calcite                            | 19  | 11  | 1   | 22   | 17   | 0    | 0    | 27   | 16   | 35   | 31   | 15   | 30   | 1    | 2    |
| Dolomites                          | 14  | 8   | 26  | 26   | 11   | 12   | 13   | 14   | 23   | 9    | 10   | 38   | 25   | 21   | 18   |
| Plagioclase                        | 5   | 12  | 6   | 3    | 5    | 5    | 5    | 2    | 9    | 3    | 5    | 7    | 2    | 3    | 11   |
| K-feldspar                         | 0   | 2   | 1   | 0    | 2    | 1    | 1    | 1    | 3    | 1    | 0    | 1    | 0    | 0    | 5    |
| Phyllosilicates                    | 29  | 21  | 20  | 18   | 18   | 25   | 13   | 22   | 7    | 15   | 27   | 5    | 18   | 42   | 17   |
| Am.XRD                             | 15  | 19  | 25  | 16   | 18   | 43   | 49   | 22   | 11   | 20   | 12   | 1    | 12   | 17   | 12   |

**Chemical analyses (wt%)**

|           |       |       |       |       |        |       |       |       |       |       |       |       |        |       |       |
|-----------|-------|-------|-------|-------|--------|-------|-------|-------|-------|-------|-------|-------|--------|-------|-------|
| SiO2      | 37.84 | 47.85 | 36.44 | 30.89 | 42.21  | 35.91 | 29.75 | 29.15 | 44.75 | 27.94 | 30.04 | 42.39 | 29.12  | 39.09 | 54.13 |
| TiO2      | 0.29  | 0.24  | 0.26  | 0.23  | 0.24   | 0.35  | 0.27  | 0.26  | 0.18  | 0.22  | 0.25  | 0.17  | 0.26   | 0.30  | 0.36  |
| Al2O3     | 11.63 | 9.43  | 9.38  | 8.88  | 8.83   | 12.86 | 8.90  | 10.59 | 5.27  | 6.27  | 9.83  | 4.84  | 9.77   | 15.42 | 11.23 |
| Fe2O3 tot | 4.05  | 2.79  | 2.78  | 2.88  | 3.01   | 4.15  | 2.81  | 3.94  | 1.29  | 1.93  | 3.01  | 1.21  | 3.57   | 4.91  | 3.03  |
| MnO       | 0.07  | 0.05  | 0.03  | 0.05  | 0.06   | 0.04  | 0.03  | 0.07  | 0.03  | 0.04  | 0.06  | 0.03  | 0.06   | 0.07  | 0.05  |
| MgO       | 4.16  | 4.76  | 5.54  | 5.61  | 5.00   | 3.26  | 2.71  | 3.93  | 4.56  | 4.34  | 5.11  | 6.11  | 4.77   | 6.04  | 4.44  |
| CaO       | 16.95 | 14.48 | 10.65 | 22.42 | 17.65  | 4.95  | 5.05  | 23.73 | 19.51 | 25.48 | 22.95 | 19.35 | 23.98  | 10.20 | 9.99  |
| Na2O      | 0.78  | 1.27  | 0.86  | 0.66  | 1.12   | 0.95  | 0.75  | 0.63  | 1.09  | 0.66  | 0.75  | 0.98  | 0.58   | 0.86  | 1.73  |
| K2O       | 2.66  | 2.08  | 1.85  | 1.91  | 1.79   | 2.56  | 1.54  | 2.29  | 1.37  | 1.33  | 2.16  | 1.18  | 2.08   | 3.43  | 2.39  |
| P2O5      | 0.15  | 0.18  | 0.24  | 0.23  | 0.21   | 0.18  | 0.30  | 0.36  | 0.19  | 0.28  | 0.20  | 0.22  | 0.20   | 0.18  | 0.09  |
| L.O.I.    | 21.02 | 16.77 | 31.94 | 26.11 | 19.91  | 34.39 | 47.59 | 24.81 | 21.31 | 31.11 | 25.35 | 23.34 | 25.65  | 19.49 | 12.47 |
| Tot       | 99.60 | 99.90 | 99.97 | 99.87 | 100.03 | 99.60 | 99.70 | 99.76 | 99.55 | 99.60 | 99.71 | 99.82 | 100.04 | 99.99 | 99.91 |
| N (%)     |       |       | 0.38  |       |        | 0.64  | 1.13  |       |       | 0.24  |       |       |        | 0.14  |       |
| Corg (%)  |       |       | 7.25  |       |        | 14.46 | 21.90 |       |       | 3.04  |       |       |        | 1.75  |       |

**ppm**

|    |     |     |     |     |     |     |     |     |     |     |     |     |     |     |     |
|----|-----|-----|-----|-----|-----|-----|-----|-----|-----|-----|-----|-----|-----|-----|-----|
| As | 4   | 35  | 87  | 15  | 6   | 181 | 220 | 15  | 23  | 27  | 19  | 31  | 20  | 60  | 13  |
| Cd | 6   | 3   | 5   | 5   | 6   | 10  | 12  | 7   | 13  | 8   | 3   | 8   | 14  | 11  | 10  |
| Cr | 54  | 29  | 39  | 44  | 33  | 55  | 69  | 66  | 16  | 34  | 46  | 22  | 58  | 69  | 53  |
| Cu | 30  | 24  | 26  | 22  | 23  | 27  | 32  | 25  | 31  | 21  | 22  | 12  | 20  | 37  | 24  |
| Ni | 25  | 33  | 24  | 21  | 28  | 18  | 18  | 15  | 16  | 12  | 13  | 8   | 9   | 6   | 2   |
| Sr | 194 | 119 | 80  | 170 | 174 | 82  | 80  | 241 | 130 | 206 | 199 | 109 | 264 | 89  | 132 |
| Zn | 228 | 135 | 132 | 130 | 268 | 142 | 164 | 153 | 143 | 127 | 180 | 111 | 133 | 267 | 263 |
