# Supplementary figures and images for: Glacial dynamics in pre-Alpine narrow valleys during the Last Glacial Maximum inferred by lowland fluvial records (northeast Italy)
Source: Copernicus journal article supplement (doi:10.5194/esurf-6-809-2018), 2018-09-26

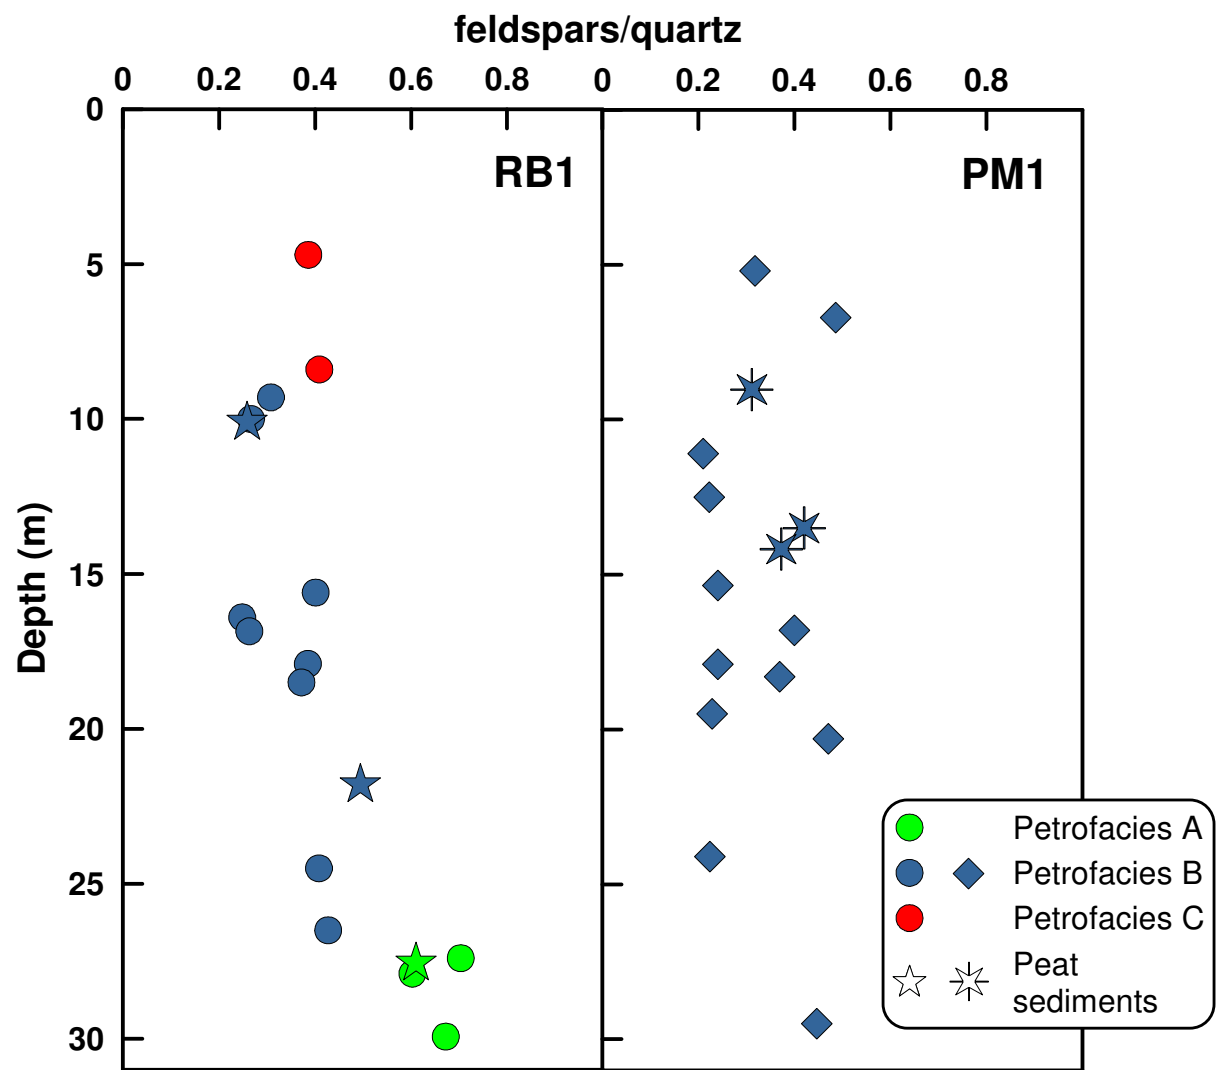

Supplement: Supplementary file 2 [file esurf-6-809-2018-supplement.zip › SFig1.pdf]
